# Supplementary material
Source: PubMed Central journal article supplement (PMC59770)

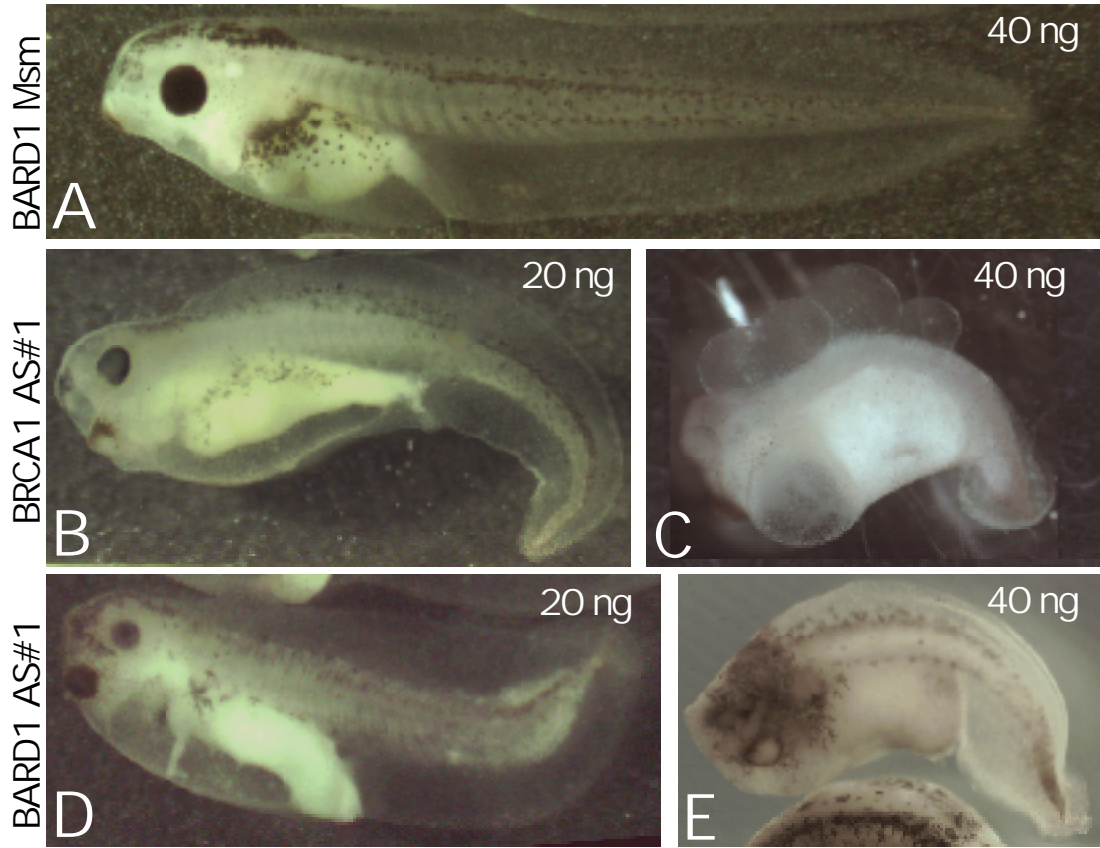

Supplement: pnas_211427098_6.pdf [file pnas_211427098_6.pdf]

A

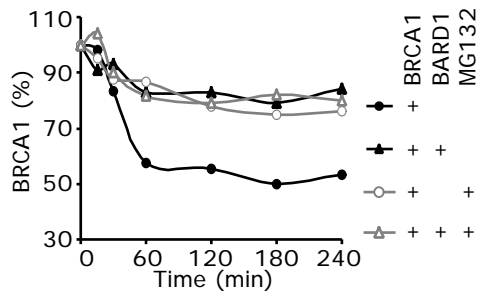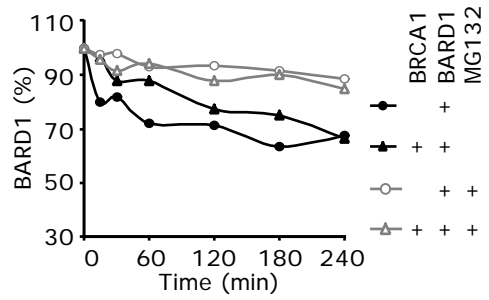

B

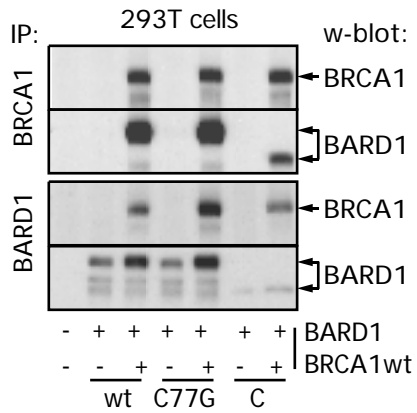

C

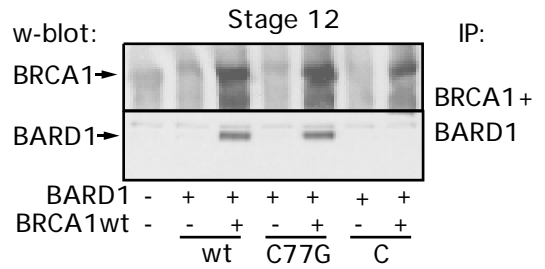

Supplement: pnas_211427098_7.pdf [file pnas_211427098_7.pdf]
